# Supplementary material for: A research agenda for hospital at home
Source: PubMed Central journal article supplement — J Am Geriatr Soc. 2022 Feb 24;70(4):1060–9. doi: 10.1111/jgs.17715 (PMC9303641; doi:10.1111/jgs.17715), 2022-02-24
Supplement: JGS-70-1060-s001.pdf [file JGS-70-1060-s001.pdf]

Supplementary Text S1: Email Invitation and Survey to Identify Research Agenda for Hospital at Home

Email Invitation to Complete the Survey

Email Subject line: Please provide input on a research agenda for Hospital at Home

Dear Congress Attendee,

Welcome to Madrid!

Thank you for bringing your interest and experience in Hospital at Home to this 1<sup>st</sup> Hospital at Home World Congress!

We are working on the development of a research agenda for the field of Hospital at Home.

We would like to ask you to participate in a survey to provide input to help in the development of this research agenda

This survey should take you no more than 5-10 minutes.

Your completion of this survey will serve as your consent to be in this research study.

This study has been approved by the Institutional Research Board of The Johns Hopkins University.

For questions and comments please feel free to contact the Principal Investigator, Dr. Bruce Leff, at [bleff@jhmi.edu](mailto:bleff@jhmi.edu) or call (410) 550-2654

Sincerely,

Bruce Leff, MD

Professor of Medicine

Johns Hopkins University School of Medicine

## Survey to Identify Research Agenda for Hospital at Home

Your completion of this survey will serve as your consent to be in this research study.

### 1. Where do you live and work?

- North America
- South America
- Europe (including United Kingdom)
- Middle East
- Asia
- Australia, New Zealand, Oceania

### 2. What is your main role(s) with regard to Hospital at Home? Check all that apply

- Hospital at Home physician
- Hospital at Home advanced practice clinician
- Hospital at Home nurse
- Hospital at Home other clinician
- Hospital at Home program leader or developer
- Hospital at Home researcher
- Hospital at Home industry-related
- Person treated in Hospital at Home or caregiver of a person treated in Hospital at Home
- Other (specify)

3. If you are involved with an active Hospital at Home program, how many patients does your Hospital at Home program treat each year?

- Not yet treating patients
- 1-50
- 51-150
- 151-300
- 301-500
- >500
- Not sure
- Not applicable

4. Identification of domains

Please check all items that need to be addressed in research related to Hospital at Home –

CHECK ALL THAT APPLY

- Selecting patients for care
- Defining the Hospital at Home care model
- Broadening the types of conditions treated in Hospital at Home
- Use of technology and telemonitoring
- Optimal provider mix and staffing issues
- Patient and caregiver care experience
- Medication management and safety

- Public education on Hospital at Home
- Education of sub-specialist physicians on Hospital at Home
- Linkages with health system
- Ethical issues
- Payment models
- Issues related to defining cost savings
- Supply chain and logistics issues to support care
- Implementation facilitators and challenges
- Defining new applications of Hospital at Home care
- Caregiver support
- Intervening on social determinants of health
- Discharge preparedness
- Educating the next generation of Hospital at Home clinicians
- Disparities in receipt of and outcomes in Hospital at Home
- Developing new applications of Hospital at Home care
- Other \_\_\_\_\_

5. Please SELECT THE 5 MOST IMPORTANT AREAS for Hospital at Home research

- Selecting patients for care
- Defining the Hospital at Home care model
- Broadening the types of conditions treated in Hospital at Home

- Use of technology and telemonitoring
- Optimal provider mix and staffing issues
- Patient and caregiver care experience
- Medication management and safety
- Public education on Hospital at Home
- Education of sub-specialist physicians on Hospital at Home
- Linkages with health system
- Ethical issues
- Payment models
- Issues related to defining cost savings
- Supply chain and logistics issues to support care
- Implementation facilitators and challenges
- Defining new applications of Hospital at Home care
- Caregiver support
- Intervening on social determinants of health
- Discharge preparedness
- Educating the next generation of Hospital at Home clinicians
- Disparities in receipt of and outcomes in Hospital at Home
- Developing new applications of Hospital at Home care
- Other \_\_\_\_\_

6. Please list any research topics or specific research questions that should be included in a research agenda for Hospital at Home or provide any additional thoughts you may have on research issues for Hospital at Home

FREE TEXT
